1 **Title**

2 Selection-driven cost-efficiency optimisation of transcripts modulates gene evolutionary rate  
3 in bacteria

4 **Authors**

5 Emily A. Seward<sup>1</sup>, Steven Kelly\*<sup>1</sup>

6 **Affiliations**

7 <sup>1</sup>Department of Plant Sciences, University of Oxford, South Parks Road, Oxford, OX1 3RB,  
8 UK

9 **ORCID iDs**

10 0000-0002-7869-0641, 0000-0001-8583-5362

11 **Corresponding Author**

12 Name: Steven Kelly

13 Email: [steven.kelly@plants.ox.ac.uk](mailto:steven.kelly@plants.ox.ac.uk)

14 Telephone: +44 (0)1865 275123

15 Address: Department of Plant Sciences, University of Oxford, South Parks Road, Oxford,  
16 OX1 3RB, UK

17 **Keywords**

18 Gene evolution, Synonymous codon use, Codon bias, Translational efficiency, Bacteria,  
19 natural selection, Transcript optimisation, Molecular evolution

20 **Abstract**

21 **Background**

22 Most amino acids are encoded by multiple synonymous codons. However synonymous  
23 codons are not used equally and this biased codon use varies between different organisms.

24 It has previously been shown that both selection acting to increase codon translational

25 efficiency and selection acting to decrease codon biosynthetic cost contribute to differences  
26 in codon bias. However, it is unknown how these two factors interact or how they affect  
27 molecular sequence evolution.

## 28 **Results**

29 Through analysis of 1,320 bacterial genomes we show that bacterial genes are subject to  
30 multi-objective selection-driven optimisation of codon use. Here, selection acts to  
31 simultaneously decrease transcript biosynthetic cost and increase transcript translational  
32 efficiency, with highly expressed genes under the greatest selection. This optimisation is not  
33 simply a consequence of the more translationally efficient codons being less expensive to  
34 synthesise. Instead, we show that tRNA gene copy number alters the cost-efficiency trade-  
35 off of synonymous codons such that for many species such that selection acting on transcript  
36 biosynthetic cost and translational efficiency act in opposition. Finally, we show that genes  
37 highly optimised to reduce cost and increase efficiency show reduced rates of synonymous  
38 and non-synonymous mutation.

## 39 **Conclusions**

40 This analysis provides a simple mechanistic explanation for variation in evolutionary rate  
41 between genes that depends on selection-driven cost-efficiency optimisation of the  
42 transcript. These findings reveal how optimisation of resource allocation to mRNA synthesis  
43 is a critical factor that determines both the evolution and composition of genes.

## 44 **Background**

45 Production of proteins is a primary consumer of cell resources [1]. It requires allocation of  
46 cellular resources to production of RNA sequences as well as allocation of resources to  
47 production of nascent polypeptide chains. Whilst a protein's amino acid sequence is  
48 functionally constrained, redundancy in the genetic code means that multiple nucleotide  
49 sequences can code for the same protein. Since the biosynthetic cost and translational

50 efficiency of synonymous codons varies, biased use of synonymous codons makes it  
51 possible to reduce the expenditure of cellular resources on mRNA production without  
52 altering the encoded protein sequence. Thus, it is possible to reduce resource allocation to  
53 protein synthesis without altering the encoded protein or affecting protein abundance. This  
54 is done by reducing transcript sequence cost or by increasing the efficiency with which those  
55 transcripts can be translated into protein. Consistent with this, it has been demonstrated that  
56 natural selection acts both to reduce biosynthetic cost of RNA sequences [2,3], and to  
57 increase the efficiency with which those RNA sequences can template the encoded  
58 polypeptide chain [4–10]. However, though selection has been shown to act on codon  
59 biosynthetic cost and translational efficiency independently, it is unknown how these two  
60 factors interact or whether optimisation of one factor inherently results in optimisation of the  
61 other. It should be noted that in addition to factors acting on resource allocation, functional  
62 constraints are also known to bias patterns of codon use, for example, RNA structural  
63 constraints to facilitate thermal adaptation and translational initiation [11–13], RNA  
64 sequence constraints to preserve splice sites [14], and translational constraints to ensure  
65 accurate protein folding [15–17]. However, since those factors primarily act on individual  
66 sites or sets of sites within genes and are independent of resource allocation, they were not  
67 considered further in this analysis.

68 Different species employ different strategies to decode synonymous codons [18]. These  
69 strategies make use of ‘wobble’ base pairing between the 3<sup>rd</sup> base of the codon and the 1<sup>st</sup>  
70 base of the anticodon to facilitate translation of all 61 sense codons using a reduced set of  
71 tRNAs. As the translational efficiency of a codon is a function of the number of tRNAs that  
72 can translate that codon, and as different species encode different subsets of tRNA genes,  
73 the same codon is not necessarily equally translationally efficient in all species. In contrast,  
74 the biosynthetic cost of a codon of RNA is determined by the number and type of atoms  
75 contained within that codon and the number of high energy phosphate bonds required for

76 their assembly. As translational efficiency varies between species but biosynthetic cost does  
77 not, it was hypothesised that this must create a corresponding variation in the codon cost-  
78 efficiency trade-off between species. For example biosynthetically cheap codons might be  
79 translationally efficient in one species but inefficient in another. We further hypothesised that  
80 variation in the codon cost-efficiency trade-off would limit the extent to which a transcript  
81 could be optimised to be both biosynthetically inexpensive and translationally efficient.

82 Here, we show that natural selection acts genome-wide to reduce cellular resource  
83 allocation to mRNA synthesis by solving the multi-objective optimisation problem of  
84 minimising transcript biosynthetic cost whilst simultaneously maximising transcript  
85 translational efficiency. We show that this optimisation is achieved irrespective of the codon  
86 cost-efficiency trade-off of a species, and that the extent to which resource allocation is  
87 optimised is a function of the production demand of that gene. Finally, we reveal that  
88 selection-driven optimisation of resource allocation provides a novel mechanistic  
89 explanation for differences in evolutionary rates between genes, and for the previously  
90 unexplained correlation in synonymous and non-synonymous mutation rates of genes.

## 91 **Results**

### 92 **Selection acts to reduce biosynthetic cost and increase translational efficiency of** 93 **transcript sequences**

94 Although selection has been shown to reduce resource allocation to mRNA production by  
95 reducing codon biosynthetic cost or increasing translational efficiency independently [2–10],  
96 it is unknown how these two factors interact or whether optimisation of one factor inherently  
97 results in optimisation of the other. To address this, an analysis was conducted on 1,320  
98 bacterial species representing 730 different genera to establish if they were either under  
99 selection to increase codon translational efficiency, reduce codon biosynthetic cost or a  
100 combination of the two (Table S1). For each species, genome-wide values for mutation bias  
101 towards GC [ $M_b$ ], selection on transcript translational efficiency [ $S_t$ ] and selection on

102 transcript biosynthetic cost [ $S_c$ ] were inferred (Fig. 1). This was done using the complete set  
103 of open reading frames and tRNAs encoded in that species' genome using the SK model [2]  
104 implemented using CodonMuSe (see Methods). Genome-wide GC content varied from 26%  
105 to 75% and so encompassed almost the entire range of known bacterial genome GC values  
106 [19], this large variation in content was reflected in the range of values observed for  $M_b$  (Fig.  
107 1a, mean = 0.44). Of the 1,320 species in this analysis, 91% had negative  $S_c$  values (mean  
108  $S_c = -0.08$ ), indicating a genome-wide selective pressure to reduce the biosynthetic cost of  
109 transcript sequences through biased synonymous codon use (Fig. 1b). This observation is  
110 consistent with previous studies that revealed analogous effects when nitrogen or energy  
111 were limited [2,3]. Similarly, 78% of species had positive values for  $S_t$  (mean  $S_t = 0.1$ ),  
112 indicating a genome-wide selective pressure to increase the translational efficiency of  
113 transcript sequences (Fig. 1c). This is consistent with multiple examples where a strong  
114 pressure has been shown to favour high translational efficiency [4–10]. Moreover, 74% of  
115 species had both a negative  $S_c$  value and a positive  $S_t$  value, demonstrating that selection  
116 is not mutually exclusive when acting on translational efficiency and codon biosynthetic cost.  
117 Indeed, the majority of species experience selection to reduce transcript biosynthetic cost  
118 while simultaneously maximising transcript translational efficiency.

### 119 **More translationally efficient bacterial codons are generally more biosynthetically** 120 **costly**

121 The biosynthetic cost of a codon can be defined as the number and type of atoms contained  
122 within the codon or the number of high energy phosphate bonds required for their assembly.  
123 Natural selection acting on biosynthetic cost, both in terms of nitrogen atoms [2] or energetic  
124 requirements [3], has been shown to play a role in promoting biased patterns of synonymous  
125 codon use. However, as the energy and nitrogen cost of a codon correlate almost perfectly  
126 (Fig. 2a), it is not possible to distinguish which factor is responsible for biased patterns of  
127 codon use in the absence of additional information about the biology of the organism in

128 question. Nonetheless, given the near perfect correlation, analysis of selection acting on  
129 overall codon biosynthetic cost can be approximated by analysis of either nitrogen or  
130 energetic requirements.

131 Codon translational efficiency is generally measured using the tRNA adaptation index (tAI),  
132 which considers both the abundance of iso-accepting tRNAs and wobble-base pairing [20].  
133 Since tRNA gene copy number varies between species, there is a corresponding variation  
134 in the relative translational efficiency of their associated codons [18,21]. Therefore, the  
135 relationship between codon biosynthetic cost and codon translational efficiency (referred to  
136 from here on as the codon cost-efficiency trade-off) must vary between species. For  
137 example, a hypothetical species encoding a full complement of tRNAs, each present as a  
138 single copy, would have a negative correlation between cost and efficiency (Fig. 2b). In  
139 contrast, a hypothetical species that employed tRNA sparing strategy 1 (no ANN tRNAs) or  
140 strategy 2 (no ANN or CNN tRNAs) [18], would show a positive (Fig. 2c) or no (Fig. 2d)  
141 correlation between cost and efficiency respectively. Therefore, a broad range of codon  
142 cost-efficiency trade-offs is possible and the gradient of this trade-off is dependent on the  
143 tRNA gene copy number of a given species.

144 None of the 1,320 species used in this analysis contained a full complement of tRNAs.  
145 Moreover, only two species strictly adhered to a single sparing strategy for all synonymous  
146 codon groups (e.g. *Escherichia coli* uses strategy 2 for decoding alanine but strategy 1 for  
147 decoding glycine). Given that neither tRNA sparing strategy 1 nor 2 led to a negative  
148 correlation between cost and efficiency, it is therefore expected that species would have  
149 either a positive or no correlation between codon cost and efficiency. Furthermore, given  
150 the many different potential tRNA complements, it is anticipated that a continuum of  
151 gradients in trade-off between cost and efficiency would be observed. To assess this, the  
152 codon cost-efficiency trade-off was calculated for the 1,320 bacterial species (Fig. 2e). As  
153 expected, species with a significant negative correlation between cost and efficiency were

154 not observed. Instead, all species exhibited either positive or non-significant correlations  
155 between codon cost and efficiency (Fig. 2e). Thus in general, the synonymous codons that  
156 are most translationally efficient are those that consume the most resources for  
157 biosynthesis.

158 **Genes that experience the strongest selection for increased transcript translational**  
159 **efficiency are also under the strongest selection to reduce biosynthetic cost**

160 Given that the majority of species exhibited selection to reduce cost and increase  
161 translational efficiency at the genome-wide level, the extent to which this was also seen at  
162 the level of an individual gene within species was determined. Here, the strength of selection  
163 acting on transcript translational efficiency and strength of selection on transcript  
164 biosynthetic cost were inferred for each individual gene in each species. The relationship  
165 between  $S_c$  and  $S_t$  was then compared for each species. For example in *Escherichia coli*,  
166 which doesn't have a strong cost-efficiency trade-off, there is a significant negative  
167 correlation between  $S_c$  and  $S_t$  (Fig. 3a). Here, the genes that experienced the greatest  
168 selection to increase efficiency are those that experienced the greatest selection to reduce  
169 biosynthetic cost. The same phenomenon was also observed for *Lactobacillus amylophilus*,  
170 a species with a strong codon cost-efficiency trade-off (Fig. 3b). Overall, significant  
171 correlations between  $S_c$  and  $S_t$  for individual genes were observed for 91% of species ( $p <$   
172  $0.05$ , Fig. 3c). Therefore irrespective of the codon cost-efficiency trade-off, selection is  
173 performing multi-objective optimisation of transcript sequences to reduce their biosynthetic  
174 cost while increasing their translational efficiency and thereby reducing resource allocation  
175 to mRNA production.

176 As the most highly expressed genes in a cell comprise the largest proportion of cellular RNA,  
177 the strength of selection experienced by a gene is thought to be dependent on the mRNA  
178 abundance of that gene [22–24]. In agreement with this, evaluation of the relative mRNA  
179 abundance of genes in *E. coli* revealed that the most highly expressed genes exhibited the

180 greatest selection to reduce transcript biosynthetic cost (Fig. 4a) whilst also showing the  
181 strongest selection to increase transcript translational efficiency (Fig. 4b). Thus, selection  
182 acts in proportion to relative mRNA abundance to perform multi-objective optimisation of  
183 codon bias in order to reduce resource allocation to transcript sequences through production  
184 of low cost, high efficiency transcripts.

### 185 **Sequence optimisation for cost and efficiency constrains molecular evolution rate**

186 Given that codon choice has been shown to provide a selective advantage per codon per  
187 generation [25], it was hypothesised that the extent to which a transcript is jointly optimised  
188 for codon cost and efficiency would constrain the rate at which the underlying gene  
189 sequence can evolve. Specifically, the more highly optimised a transcript is for both  
190 biosynthetic cost and translational efficiency, the higher the proportion of spontaneous  
191 mutations that would reduce the cost-efficiency optimality of the transcript sequence.  
192 Therefore, spontaneous mutations in highly optimised genes are more likely to be  
193 deleterious than spontaneous mutations in less optimised genes. As deleterious mutations  
194 are lost more rapidly from the population than neutral mutations, the more highly optimised  
195 a gene sequence is, the lower its apparent evolutionary rate should be.

196 To test this hypothesis the complete set of gene sequences from *E.coli* was subject to  
197 stochastic *in silico* mutagenesis and the proportion of single nucleotide mutations that  
198 resulted in reduced transcript cost-efficiency optimality was evaluated. As expected, the  
199 proportion of deleterious mutations increased linearly with transcript sequence optimality.  
200 This effect was seen for both synonymous (Fig. 5a) and non-synonymous mutations (Fig.  
201 5b). The effect in non-synonymous mutations is seen because a single base mutation from  
202 an optimal codon encoding one amino acid is unlikely to arrive at an equally optimal (or  
203 better) codon encoding any other amino acid. Thus as expected, the more optimal a codon  
204 is, the less likely a spontaneous mutation will result in a codon with higher optimality  
205 irrespective of whether that codon encodes the same amino acid.



206 The extent to which transcript sequences in *E. coli* were jointly cost-efficiency optimised was  
207 compared to the synonymous ( $K_s$ ) and non-synonymous ( $K_a$ ) mutation rate of that gene,  
208 estimated from comparison with *Salmonella enterica*. Consistent with the hypothesis, the  
209 rate of synonymous ( $K_s$  Fig. 5c) and non-synonymous ( $K_a$  Fig. 5d) changes were directly  
210 proportional to the extent to which the gene sequence had been optimised by natural  
211 selection for low biosynthetic cost and high translational efficiency (Fig. 5a and b). While  
212 efficiency optimisation explained more of the variance in gene evolutionary rate, the linear  
213 regression model that considered both cost and efficiency optimisation was significantly  
214 better than models that considered either factor alone, whether or not derived optimisation  
215 values or raw tAI and biosynthetic costs were considered (Supplementary Fig. S1, ANOVA,  
216  $p < 0.001$ ). Therefore, this analysis provides a mechanistic explanation for previous studies  
217 that found a strong correlation between non-synonymous evolutionary rate and mRNA  
218 abundance [22]. To determine if this relationship was also observed for other bacteria, an  
219 additional 177 species-pairs were analysed (Fig. 5e). Of these species pairs, 66% were  
220 consistent with the observation for *E. coli* and *S. enterica*, such that variance in selection-  
221 driven gene sequence optimisation explained on average 8% of variance in  $K_s$  between  
222 genes (Fig. 5e). Thus, the extent to which transcript sequences are jointly optimised for cost  
223 and efficiency is sufficient to explain a significant component of variation in molecular  
224 evolutionary rate between genes within a species. Moreover, selection-driven cost-efficiency  
225 optimality is also sufficient to explain the correlation between the rates of synonymous and  
226 non-synonymous mutations.

## 227 **Discussion**

228 Differences in molecular evolution rates between species are thought to be mainly due to  
229 differences in organism generation-time [27]. However, differences in evolutionary rates  
230 between genes in the same species lack a complete mechanistic explanation. Prior to the  
231 study presented here, it was known that functional constraints of the encoded protein

232 sequence contribute to the constraint of the rate of non-synonymous changes [28]. It had  
233 also been observed that mRNA abundance and patterns of codon bias correlated with the  
234 evolutionary rate of genes [29,30], and that rates of synonymous and non-synonymous  
235 changes were correlated [26]. The study presented here unifies these prior observations  
236 and provides a mechanistic explanation for both variation and correlation in molecular  
237 evolution rates of genes. Specifically, this study shows that stochastic mutations in gene  
238 sequences are more likely to result in deleterious alleles in proportion to the extent to which  
239 that gene sequence has been jointly optimised by natural selection for reduced transcript  
240 biosynthetic cost and enhanced translational efficiency.

241 The mechanism provided here also explains the relationship between mRNA abundance  
242 and gene evolutionary rate. Specifically, functional constraints on protein abundance  
243 stipulate the quantity of mRNA required to produce that protein. The more mRNA that is  
244 required, the greater the percentage of total cellular resources that must be invested within  
245 that transcript. The mechanism simply entails that the more transcript that is present, the  
246 stronger the selective pressure will be to reduce the cellular resources committed to that  
247 transcript. Importantly, minimising these resources can be achieved both by using codons  
248 that require fewer resources for their biosynthesis, or by utilising translationally efficient  
249 codons that increase the protein to transcript ratio and therefore reduce the amount of  
250 transcript required to produce the same amount of protein. Overall, this study reveals how  
251 the economics of gene production is a critical factor in determining both the evolution and  
252 composition of genes.

### 253 **Conclusions**

254 Codon use is biased across the tree-of-life, with patterns of bias varying both between  
255 species and between genes within the same species. Here we demonstrate that variation in  
256 tRNA content between species creates a corresponding variation in the codon cost-  
257 efficiency trade-off whereby codons that cost the least to biosynthesise are not equally

258 translationally efficient in all species. We show that irrespective of the codon cost-efficiency  
259 trade-off, natural selection performs multi-objective gene sequence optimisation so that  
260 transcript sequences are optimised to be both low cost and highly translationally efficient,  
261 and that the nature of this trade-off constrains the extent of the solution. We demonstrate  
262 that this multi-objective optimisation is dependent on mRNA abundance, such that the  
263 transcripts that comprise the largest proportion of cellular mRNA are those that experience  
264 the strongest selection to be both low cost and highly efficient. Finally, we show that the  
265 extent to which a gene sequence is jointly optimised for reduced transcript cost and  
266 enhanced translational efficiency is sufficient to explain a significant proportion of the  
267 variation in the rate of gene sequence evolution. Furthermore, it is sufficient to explain the  
268 phenomenon that the rate of synonymous and non-synonymous mutation for a gene is  
269 correlated [26].

## 270 **Methods**

### 271 **Data sources**

272 1,320 bacterial genomes were obtained from the NCBI ([www.ncbi.nlm.nih.gov](http://www.ncbi.nlm.nih.gov)). In order to  
273 avoid over-sampling of more frequently sequenced genera, the number of species from each  
274 genus was restricted to 5 with a maximum of 1 species for each genus. Therefore, the 1,320  
275 species sampled in this study were distributed among 730 different genera. Only genes that  
276 were longer than 30 nucleotides, had no in-frame stop codons, and began and ended with  
277 start and stop codons respectively were analysed. Each species in this analysis contained  
278 a minimum of 500 genes that fit these criteria. Full details of species names, genome  
279 accession numbers, strain details and selection coefficients are provided in Supplementary  
280 Table 1.

### 281 **Evaluation of translational efficiency (tAI)**

282 To obtain the number of tRNA genes in each genome, tRNAscan was run on each of the  
283 1,320 bacterial genomes [31]. This current version (1.4) of tRNAscan is unable to distinguish

284 between tRNA-Met and tRNA-Ile with the anticodon CAT. Thus tRNA-Ile(CAT), while  
285 present, is not detected in any of the genomes. To compensate for this a single copy of  
286 tRNA-Ile with the anticodon CAT was added to the tRNA counts for each species if more  
287 than one tRNA-Met(CAT) was found. The tRNA adaptation index (tAI)[21], which considers  
288 both the tRNA gene copy number and wobble-base pairing when calculating the  
289 translational efficiency of a codon was evaluated using the optimised  $s_{ij}$  values for bacteria  
290 obtained by Tuller et al [32] and the equation developed by dos Reis et al [20].  $s_{uu}$  was set  
291 to 0.7 as proposed by Navon et al [33] and  $s_{uc}$  was set to 0.95 as U<sub>34</sub> has been shown to  
292 have weak codon-anticodon coupling with cytosine [34]. Each species in this analysis was  
293 able to translate all codons, was not missing key tRNAs and did not require unusual tRNA-  
294 modifications.

### 295 **Calculation of relative codon cost and efficiency**

296 Codon biosynthetic cost and translational efficiency were calculated relative to other  
297 synonymous codons such that the synonymous codon with the greatest value had a relative  
298 cost or efficiency of 1. For example, the nitrogen cost of GCC is 11 atoms. The most  
299 expensive synonymous codon is GCG/GCA (13 atoms). Therefore the relative cost of GCC  
300 is  $11/13 = 0.85$ . The same evaluation was done to calculate codon translational efficiency.

### 301 **CodonMuSe: A fast and efficient algorithm for evaluating drivers of codon usage bias**

302 The SK model [2] was used to infer the joint contribution of mutation bias, selection acting  
303 on codon biosynthetic cost and selection acting on codon translational efficiency to biased  
304 synonymous codon use. To facilitate the large scale comparative application of this model  
305 a rapid, stand-alone version was implemented in python.

306 The algorithm, instructions for use, and example files are available for download at  
307 <https://github.com/easeward/CodonMuSe>. For each species, the values of  $M_b$ ,  $S_c$  and  $S_t$   
308 were inferred using the complete set of protein coding genes and the tRNA copy number

309 inferred using tRNAscan. Further details about the algorithm can be found in Supplemental  
310 File 1.

### 311 **Comparing selection acting on codon bias and transcript abundance levels**

312 Transcriptome data for *E. coli* str. K-12 MG1655 were downloaded from NCBI (series  
313 GSE15534). The raw data was subject to quantile normalisation and background correction  
314 as implemented in the NimbleScan software package, version 2.4.27 [35,36]. The three  
315 biological replicates for the logarithmic growth phase were available, however the third  
316 replicate was inconsistent with the first two and so was excluded from this analysis. As each  
317 gene had multiple probes, the average probe value for each gene was taken. The three-  
318 parameter CodonMuSe model using the value for  $M_b$  estimated from a genome-wide  
319 analysis was run for each of the 4099 genes in *E. coli* individually, and thus values for  $S_c$   
320 and  $S_t$  were obtained for each gene. The values for these selection coefficients were plotted  
321 against relative mRNA abundance data described above [35].

### 322 **Calculating the extent to which gene sequences were jointly optimised for cost and** 323 **efficiency**

324 To define the extent to which a sequence has been jointly optimised for both biosynthetic  
325 cost and translational efficiency the relative Pareto optimality of each gene was calculated.  
326 To do this, the boundaries of sequence space were defined as in Supplementary Fig. S2.  
327 Here, the cost-efficiency Pareto frontier is the full set of coding sequences that are Pareto  
328 efficient, where it is impossible to change the codons of the sequence to make the transcript  
329 cheaper without making it less efficient (or vice versa) (red frontier, Supplementary Fig. S2).  
330 The opposite frontier is the full set sequences where it is impossible to change the codons  
331 of the sequence to make the transcript more expensive without making it more efficient (or  
332 vice versa) (blue frontier, Supplementary Fig. S2). Thus, the extent to which transcript  
333 sequences were jointly optimised for both biosynthetic cost and translational efficiency was  
334 evaluated as the relative distance of a given gene to the cost-efficiency Pareto frontier for

335 the sequence constrained by the amino acid sequence, i.e.  $\left(\frac{d^4}{d_1+d_4}\right) * 100$  (Supplementary  
336 Fig. S2). Therefore, a value of 100% optimisation represents a gene that lies on the Pareto  
337 frontier. Genes that are less than 100% optimised occupy the space between the cost-  
338 efficiency Pareto frontier (red frontier) and the opposite frontier (blue frontier, minimising  
339 transcript efficiency or maximising cost) for that amino acid sequence (Supplementary Fig.  
340 S2).

### 341 **Calculation of molecular evolution rates**

342 Molecular evolutionary rates ( $K_a$  and  $K_s$  values) were calculated for orthologous genes in *E.*  
343 *coli* and *S. enterica*. 2,468 single-copy orthologous genes were identified for *E. coli* and *S.*  
344 *enterica* using OrthoFinder v1.1.4 [37]. These sequences were aligned at the amino acid  
345 level using MergeAlign [38] and this alignment was then rethreaded with the coding  
346 sequences to create codon-level nucleotide alignments. Only aligned sequences longer  
347 than 30 nucleotides with less than 10% gaps were used. Gapped regions were removed  
348 and KaKs\_Calculator 2.0 [39] was run using the GMYN model to evaluate  $K_a$  and  $K_s$  values  
349 for each pair of aligned nucleotide sequences. As the molecular evolution rates represent  
350 the average of the mutation rates of the gene-pair since they last shared a common  
351 ancestor, these rates were compared to the average optimality of the same gene-pair in  
352 both species.

353 The same analysis was conducted on 1,066 additional pairs of species obtained by  
354 exhaustive pairwise comparison of all species that were within the same genus. These 1,066  
355 pairwise comparisons were filtered to remove those with  $K_s$  saturation (i.e. mean  $K_s > 1$ ) and  
356 fewer than 1,000 genes. This filtered set contained 177 species pairs.

### 357 **Linear regression analyses**

358 All linear regression analyses were conducted using the lm package in R. In all cases, p-  
359 values quoted are the p-values for the linear regression model.

360 ***Declarations***

361 **Ethics approval and consent to participate**

362 Not applicable

363 **Consent for publication**

364 Not applicable

365 **Availability of data and material**

366 The datasets generated and/or analysed during the current study are available from the  
367 corresponding author on reasonable request.

368 **Competing interests**

369 The authors declare that they have no competing interests.

370 **Funding**

371 EAS is supported by a BBSRC studentship through BB/J014427/1. SK is a Royal Society  
372 University Research Fellow. Work in SK's lab is supported by the European Union's Horizon  
373 2020 research and innovation programme under grant agreement number 637765.

374 **Authors' contributions**

375 SK and EAS conceived the study, EAS conducted the analysis, EAS and SK wrote the  
376 manuscript. Both authors read and approved the final manuscript.

377 **Acknowledgements**

378 Not applicable

379 ***Figure legends***

380 **Fig 1. Bacterial genomes show selection to reduce nucleotide cost ( $-S_c$ ) and increase**  
381 **translational efficiency ( $+S_t$ ).**

382 Genome-wide values for 1,320 bacterial species covering 730 genera for **a)** mutation bias  
383 towards GC ( $M_b$ ). Positive values indicate mutation bias towards GC. Negative values

384 indicate mutation bias towards AT. **b)** Strength of selection acting on codon biosynthetic  
385 cost ( $S_c$ ). Negative values indicate selection acting to reduce biosynthetic cost. **c)** Strength  
386 of selection acting on codon translational efficiency ( $S_t$ ). Positive values indicate selection  
387 acting to increase codon translational efficiency.

388

389 **Fig 2. Different tRNA sparing strategies alter a species' codon cost-efficiency trade-**  
390 **off.**

391 **a)** Codon nitrogen cost (N cost) correlates almost perfectly with codon energetic cost ( $p <$   
392  $0.05$ ,  $y = 0.6x + 0.44$ ,  $R^2 = 0.98$ ). **b)** A full complement of tRNAs has a negative correlation  
393 between codon biosynthetic cost and translational efficiency (tAI) ( $p < 0.05$ ,  $y = -0.5x + 1.21$ ,  
394  $R^2 = 0.10$ ). **c)** tRNA sparing strategy 1 (NNU codons translated by GNN anticodons) has a  
395 positive correlation between codon biosynthetic cost and translational efficiency ( $p < 0.05$ ,  $y$   
396  $= 0.9x - 0.06$ ,  $R^2 = 0.18$ ). **d)** tRNA sparing strategy 2 (strategy 1 + NNG codons translated  
397 by UNN anticodons) has no significant correlation between codon biosynthetic cost and  
398 translational efficiency ( $p > 0.05$ ,  $y = 0.74$ ,  $R^2 = 0$ ). **e)** None of the 1,320 bacterial species in  
399 this analysis have a significant negative correlation between codon cost and translational  
400 efficiency ( $p > 0.05$ ). The y-axis is the gradient of the line of best fit between codon  
401 biosynthetic cost and translational efficiency.

402 **Fig. 3. The genes under the strongest selection for translational efficiency (+ $S_t$ ) are**  
403 **also under the strongest selection to reduce nucleotide cost (- $S_c$ ).**

404 Scatterplots of gene-specific  $S_t$  and  $S_c$  values for **a)** *Escherichia coli* **b)** *Lactobacillus*  
405 *amylophilus*. In both cases the line of best fit is shown (red) and the yellow dot is the  
406 genome-wide best-fit value for each species. Each point has been set to an opacity of 20%  
407 so density can be judged. **c)** Histogram of the slope between  $S_c$  and  $S_t$  for individual genes  
408 for each of the 1,320 bacterial species in this analysis.



409 **Fig. 4. Selection acts in proportion to mRNA abundance to decrease codon**  
410 **biosynthetic cost and increase codon translational efficiency in *Escherichia coli*.**

411 **a)** There is a negative correlation between selection acting on codon biosynthetic cost ( $S_c$ )  
412 and mRNA abundance. The linear line of best fit (shown here on a log scale) has an  $R^2$   
413 value of 0.18. **b)** There is a positive correlation between selection acting to increase codon  
414 translational efficiency ( $S_t$ ) and gene expression. The linear line of best fit (shown here on a  
415 log scale) has an  $R^2$  value of 0.13. Each point has been set to an opacity of 20% so density  
416 can be judged.

417 **Fig. 5. Selection-driven optimisation of resource allocation is a critical factor that**  
418 **determines molecular evolution rate.**

419 Highly cost-efficiency optimised genes have a higher proportion of deleterious **a)**  
420 synonymous ( $y = 1.15x - 8$ ,  $R^2 = 0.81$ ) and **b)** non-synonymous ( $y = 1.71x - 38$ ,  $R^2 = 0.78$ )  
421 mutations. Orthologous genes in *Escherichia coli* and *Salmonella enterica* show a negative  
422 correlation between sequence cost-efficiency optimisation and the rate of **c)** synonymous  
423 mutations ( $K_s$ ) ( $y = -11x + 61$ ,  $R^2 = 0.26$ ) and **d)** non-synonymous mutation ( $K_a$ ) ( $y = -9x +$   
424  $48$ ,  $R^2 = 0.28$ ). **e)** histogram of proportion of gene evolutionary rate explained by selection-  
425 driven cost-efficiency optimisation of transcript sequences.

426 **Supplementary Figure 1. Correlation between tAI and codon biosynthetic cost with**  
427  **$K_s$  and  $K_a$  for *Escherichia coli* and *Salmonella enterica*.**

428 **a)** Scatter-plot of  $\log_{10}(K_s)$  compared to average tAI per codon per gene ( $y = -0.3x + 2.2$ ,  $R^2$   
429  $= 0.25$ ). **b)** Scatter-plot of  $\log_{10}(K_a)$  compared to average tAI per codon per gene ( $y = -0.3x$   
430  $+ 1.8$ ,  $R^2 = 0.26$ ). **c)** Scatter-plot of  $\log_{10}(K_s)$  compared to average cost per codon per gene  
431 ( $y = -0.1x + 11.4$ ,  $R^2 = 0.02$ ). **d)** Scatter-plot of  $\log_{10}(K_a)$  compared to average cost per codon  
432 per gene ( $y = -0.1x + 11.3$ ,  $R^2 = 0.01$ ).

433 **Supplementary Figure 2. Example cost-efficiency Pareto frontier for a short amino**  
434 **acid sequence.**

435 **a)** Scatter plot of the 64 possible coding sequences encoding the amino acid sequence  
436 MTGCD. Red dots indicate coding sequences that are positioned on the best cost-efficiency  
437 Pareto frontier (the least expensive, most translationally efficient sequences possible). Blue  
438 dots indicate coding sequences that are positioned on the worst cost-efficiency Pareto  
439 frontier (the most expensive, least translationally efficient sequences possible). **b)**  
440 Evaluating the cost-efficiency optimality of a coding sequence.  $d_1$  is the minimum distance  
441 between a given coding sequence and the best cost-efficiency Pareto frontier (red) for that  
442 amino acid sequence.  $d_4$  is the minimum distance of the same gene to the worse cost-  
443 efficiency Pareto frontier for that amino acid sequence (blue). The percent optimality of the  
444 coding sequence is evaluated as  $\left(\frac{d_4}{d_1+d_4}\right) * 100$ .

445 **References**

- 446 1. Farmer IS, Jones CW. The Energetics of Escherichia coli during Aerobic Growth in  
447 Continuous Culture. *Eur. J. Biochem.* 1976;67:115–22.
- 448 2. Seward EA, Kelly S. Dietary nitrogen alters codon bias and genome composition in  
449 parasitic microorganisms. *Genome Biol.* 2016;17:1–15.
- 450 3. Chen W-H, Lu G, Bork P, Hu S, Lercher M. Energy efficiency trade-offs drive nucleotide  
451 usage in transcribed regions. *Nat. communications.* 2016;7:1–10.
- 452 4. Horn D. Codon usage suggests that translational selection has a major impact on protein  
453 expression in trypanosomatids. *BMC Genomics.* 2008;9:1–11.
- 454 5. Rocha EPC. Codon usage bias from tRNA's point of view: Redundancy, specialization,  
455 and efficient decoding for translation optimization. *Genome Res.* 2004;14:2279–86.
- 456 6. Sørensen M a, Kurland CG, Pedersen S. Codon usage determines translation rate in  
457 Escherichia coli. *J. Mol. Biol.* 1989;207:365–77.
- 458 7. Hu H, Gao J, He J, Yu B, Zheng P, Huang Z, et al. Codon Optimization Significantly  
459 Improves the Expression Level of a Keratinase Gene in Pichia pastoris. *PLoS One.*  
460 2013;8:e58393.
- 461 8. Akashi H. Synonymous codon usage in Drosophila melanogaster: Natural selection and  
462 translational accuracy. *Genetics.* 1994;136:927–35.
- 463 9. Shah P, Gilchrist M a. Explaining complex codon usage patterns with selection for

- 464 translational efficiency, mutation bias, and genetic drift. *Proc. Natl. Acad. Sci. U. S. A.*  
465 2011;108:10231–6.
- 466 10. Precup J, Parker J. Missense misreading of asparagine codons as a function of codon  
467 identity and context. *J. Biol. Chem.* 1987;262:11351–5.
- 468 11. Lao PJ, Forsdyke DR. Thermophilic bacteria strictly obey Szybalski's transcription  
469 direction rule and politely purine-load RNAs with both adenine and guanine. *Genome Res.*  
470 2000;10:228–36.
- 471 12. Paz A, Mester D, Baca I, Nevo E, Korol A. Adaptive role of increased frequency of  
472 polypurine tracts in mRNA sequences of thermophilic prokaryotes. *Proc. Natl. Acad. Sci. U.*  
473 *S. A.* 2004;101:2951–6.
- 474 13. Goodman DB, Church GM, Kosuri S. Causes and Effects of N-Terminal Codon Bias in  
475 Bacterial Genes. *Science.* 2013;342:475–80.
- 476 14. Eskesen ST, Eskesen FN, Ruvinsky A. Natural selection affects frequencies of AG and  
477 GT dinucleotides at the 5' and 3' ends of exons. *Genetics.* 2004;167:543–50.
- 478 15. Novoa EM, Ribas de Pouplana L. Speeding with control: Codon usage, tRNAs, and  
479 ribosomes. *Trends Genet.* 2012;28:574–81.
- 480 16. Zhang F, Saha S, Shabalina SA, Kashina A. Differential Arginylation of Actin Isoforms  
481 Is Regulated by Coding Sequence-Dependent Degradation. *Science.* 2010;329:1534–7.
- 482 17. Drummond DA, Wilke CO. Mistranslation-induced protein misfolding as a dominant  
483 constraint on coding-sequence evolution. *Cell.* 2008;134:341–52.
- 484 18. Grosjean H, de Crécy-Lagard V, Marck C. Deciphering synonymous codons in the three  
485 domains of life: Co-evolution with specific tRNA modification enzymes. *FEBS Lett.*  
486 *Federation of European Biochemical Societies;* 2010;584:252–64.
- 487 19. Brocchieri L. The GC content of bacterial genomes. *Phylogenetics Evol. Biol.*  
488 2013;1:e106.
- 489 20. dos Reis M, Savva R, Wernisch L. Solving the riddle of codon usage preferences: A test  
490 for translational selection. *Nucleic Acids Res.* 2004;32:5036–44.
- 491 21. dos Reis M, Wernisch L, Savva R. Unexpected correlations between gene expression  
492 and codon usage bias from microarray data for the whole *Escherichia coli* K-12 genome.  
493 *Nucleic Acids Res.* 2003;31:6976–85.
- 494 22. Drummond DA, Wilke CO. The evolutionary consequences of erroneous protein  
495 synthesis. *Nat Rev Genet.* 2009;10:715–24.
- 496 23. Ran W, Higgs PG. Contributions of Speed and Accuracy to Translational Selection in  
497 Bacteria. *PLoS One.* 2012;7:1–7.
- 498 24. Pal C, Papp B, Hurst LD. Highly expressed genes in yeast evolve slowly. *Genetics.*  
499 2001;158:931.
- 500 25. Brandis G, Hughes D. The Selective Advantage of Synonymous Codon Usage Bias in  
501 *Salmonella*. *PLOS Genet.* 2016;12:e1005926.

- 502 26. Sharp PM. Determinants of DNA sequence divergence between *Escherichia coli* and  
503 *Salmonella typhimurium*: Codon usage, map position, and concerted evolution. *J. Mol. Evol.*  
504 1991;33:23–33.
- 505 27. Weller C, Wu M. A generation-time effect on the rate of molecular evolution in bacteria.  
506 *Evolution* (N. Y). 2015;69:643–52.
- 507 28. Zuckerkandl E. Evolutionary processes and evolutionary noise at the molecular level. I.  
508 Functional Density in Proteins. *J. Mol. Evol.* 1976;7:167–83.
- 509 29. Sharp PM, Li WH. The rate of synonymous substitution in enterobacterial genes is  
510 inversely related to codon usage bias. *Mol. Biol. Evol.* 1987;4:222–30.
- 511 30. Drummond DA, Raval A, Wilke CO. A single determinant dominates the rate of yeast  
512 protein evolution. *Mol. Biol. Evol.* 2006;23:327–37.
- 513 31. Schattner P, Brooks AN, Lowe TM. The tRNAscan-SE, snoscan and snoGPS web  
514 servers for the detection of tRNAs and snoRNAs. *Nucleic Acids Res.* 2005;33:686–9.
- 515 32. Sabi R, Tuller T. Modelling the Efficiency of Codon – tRNA Interactions Based on Codon  
516 Usage Bias. *DNA Res.* 2014;21:511–25.
- 517 33. Navon S, Pilpel Y. The role of codon selection in regulation of translation efficiency  
518 deduced from synthetic libraries. *Genome Biol.* 2011;12:1–10.
- 519 34. Näsvalld SJ, Chen P, Björk GR. The modified wobble nucleoside uridine-5-oxyacetic acid  
520 in tRNA Pro cmo 5 UGG promotes reading of all four proline codons in vivo The modified  
521 wobble nucleoside uridine-5-oxyacetic acid in tRNA Pro cmo UGG promotes reading of all  
522 four proline codons in vi. 2004;10:1662–73.
- 523 35. Cho B-K, Zengler K, Qiu Y, Park YS, Knight EM, Barrett CL, et al. Elucidation of the  
524 transcription unit architecture of the *Escherichia coli* K-12 MG1655 genome. *Nat. Biotechnol.*  
525 Nature Publishing Group; 2009;27:1043–9.
- 526 36. Bolstad BM, Irizarry RA, Astrand M, Speed TP. A comparison of normalization methods  
527 for high density oligonucleotide array data based on variance and bias. *Bioinformatics.*  
528 2003;19:185–93.
- 529 37. Emms DM, Kelly S. OrthoFinder: solving fundamental biases in whole genome  
530 comparisons dramatically improves orthogroup inference accuracy. *Genome Biol. Genome*  
531 *Biology*; 2015;16:1–14.
- 532 38. Collingridge PW, Kelly S. MergeAlign: improving multiple sequence alignment  
533 performance by dynamic reconstruction of consensus multiple sequence alignments. *BMC*  
534 *Bioinformatics.* 2012;13:1–10.
- 535 39. Wang D, Zhang Y, Zhang Z, Zhu J, Yu J. KaKs\_Calculator 2.0: A Toolkit Incorporating  
536 Gamma-Series Methods and Sliding Window Strategies. *Genomics, Proteomics Bioinforma.*  
537 *Beijing Institute of Genomics*; 2010;8:77–80.

538

539

540 **Figure 1**

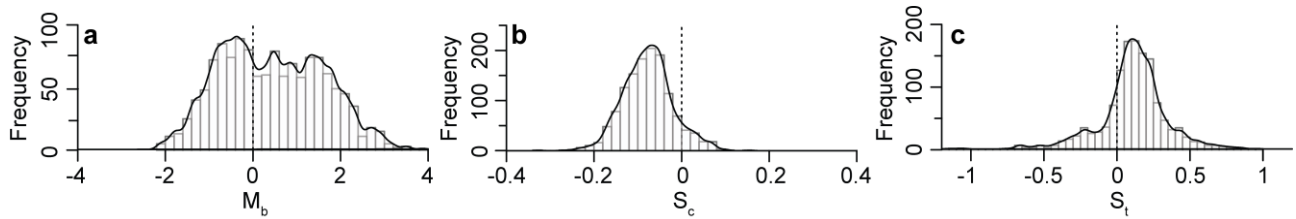

542 **Figure 2**

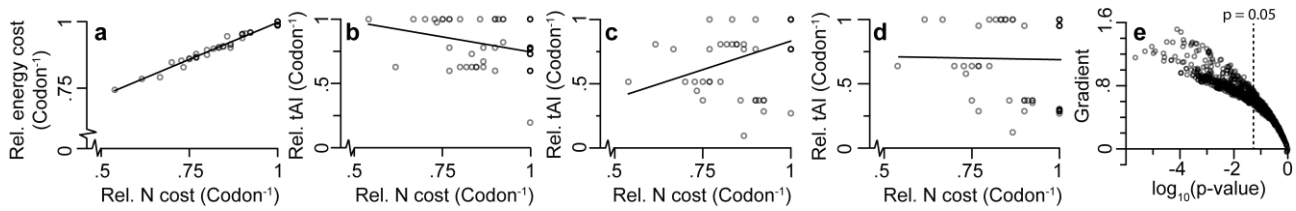

544 **Figure 3**

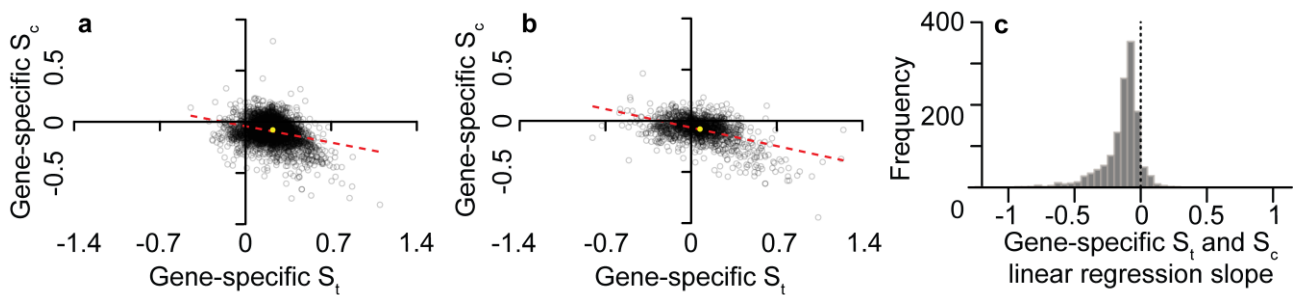

546 **Figure 4**

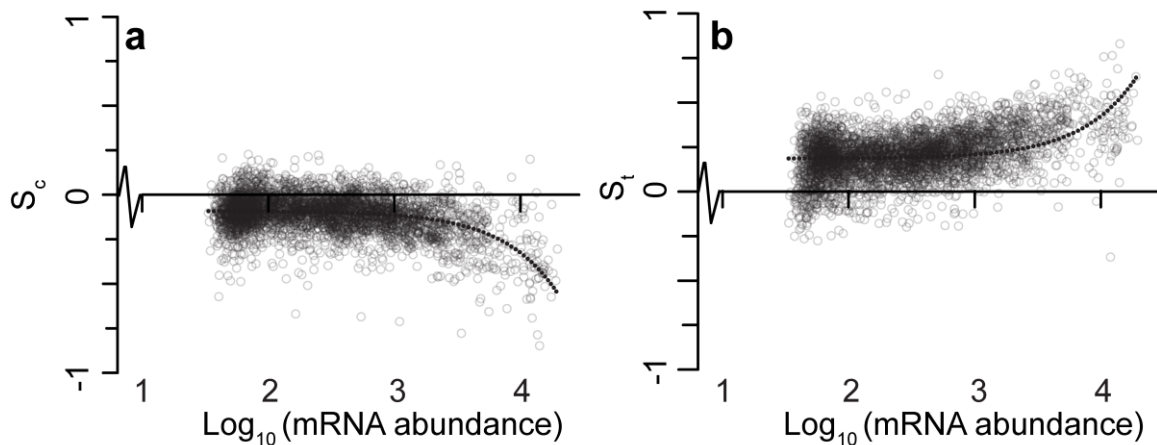

548 **Figure 5**

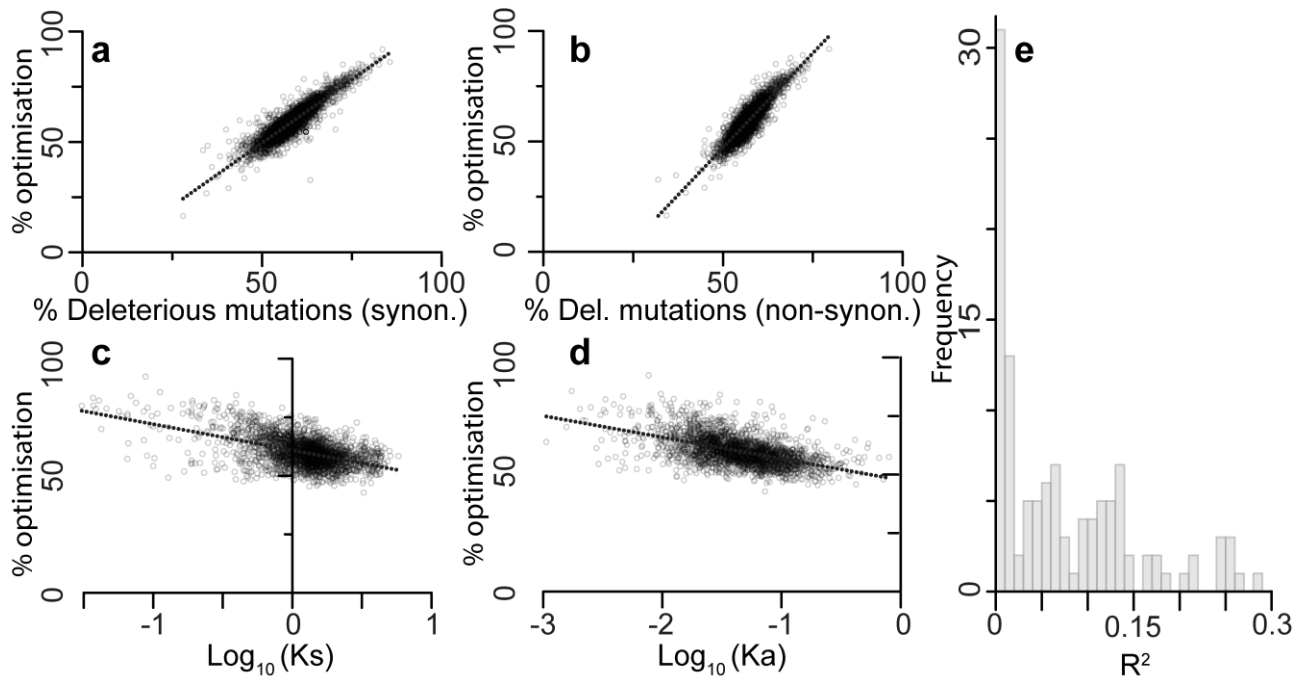

549
